# Supplementary material for: One-step synthesis of hierarchical α-Ni(OH)2 flowerlike architectures and their gas sensing properties for NOx at room temperature
Source: Royal Society of Chemistry journal article supplement (doi:10.1039/c2ce25553g), 2012-01-01
Supplement: c2ce25553g.pdf [file c2ce25553g.pdf]

# Supporting Information

## One-step synthesis of hierarchical $\alpha$ -Ni(OH)<sub>2</sub> flowerlike architectures and their gas sensing properties to NO<sub>x</sub> at room temperature

Hongjie Wang<sup>1</sup>, Jun Gao<sup>1</sup>, Zhigang Li<sup>1</sup>, Yunlong Ge<sup>1</sup>, Kan Kan<sup>1,2</sup>, Keying Shi<sup>1\*</sup>

1. Key Laboratory of Functional Inorganic Material Chemistry, Ministry of Education. Key Laboratory of Physical Chemistry, School of Chemistry and Chemical Engineering, Heilongjiang University, Harbin 150080; 2. Daqing Branch, Heilongjiang Academy of Sciences, Daqing 163316, People's Republic of China.

School of Chemistry and Materials Science, Heilongjiang University, Harbin, 150080, P.R.China. Fax: Tel: +86 451 86609141; E-mail: shikeying2008@yahoo.cn (K. Y. Shi).

Table S1 The data of FT-IR spectrum for the  $\alpha$ -Ni(OH)<sub>2</sub>

|                                |          |                       |                                                               |                                                      |                  |                               |                              |                                                      |                                   |       |      |
|--------------------------------|----------|-----------------------|---------------------------------------------------------------|------------------------------------------------------|------------------|-------------------------------|------------------------------|------------------------------------------------------|-----------------------------------|-------|------|
| wavenumber<br>cm <sup>-1</sup> | 364<br>6 | 3499                  | 2958,<br>2927,<br>2856,                                       | 2226                                                 | 1600             | 1460                          | 1393,<br>1287,<br>1172       | 1130,<br>1037,<br>1009                               | 833                               | 640   | 483  |
| functional<br>group            | -OH      | OH---H <sub>2</sub> O | -CH <sub>3</sub> ,<br>-CH <sub>2</sub><br>(DBS <sup>-</sup> ) | C≡N<br>(OCN <sup>-</sup><br>or<br>CNO <sup>-</sup> ) | C=C<br>(benzene) | CO <sub>3</sub> <sup>2-</sup> | NO <sub>3</sub> <sup>-</sup> | SO <sub>4</sub> <sup>2-</sup><br>(DBS <sup>-</sup> ) | C-H<br>(p-substituted<br>benzene) | Ni-OH | Ni-O |

The thermal behavior of the  $\alpha$ -Ni(OH)<sub>2</sub> sample was investigated with TG measurements recorded at 35~600 °C (see Fig.S1 and Table S1). It is clear that the first stage occurs between 35~200 °C, and the total weight loss is measured to be 5.24~14.00 %, corresponding to the loss of the interlayer water molecules. The major weight loss occurs between 200 and 530 °C, and the total weight loss is measured to be 27.93~36.10 %, in agreement with the value calculated from the decomposition process of  $\alpha$ -Ni(OH)<sub>2</sub> to NiO.

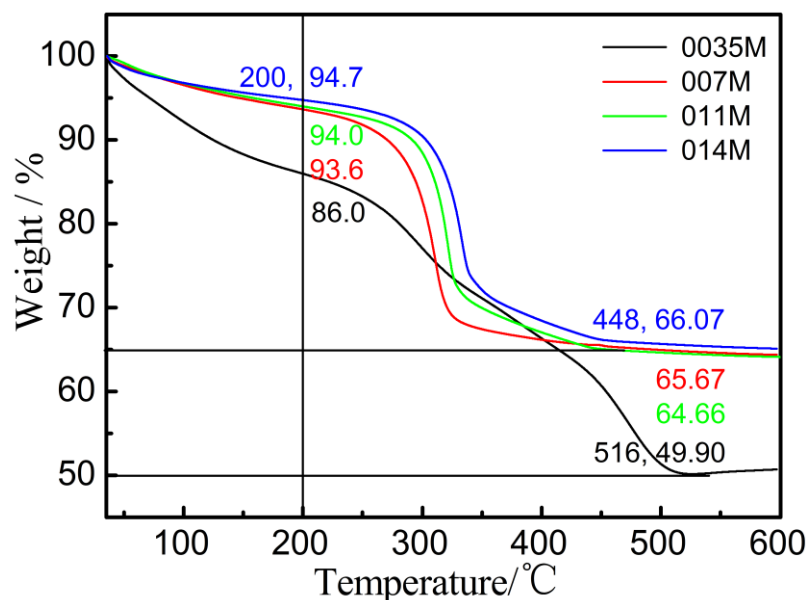

Fig. S1 TG curves of the  $\alpha$ -Ni(OH)<sub>2</sub> samples

Table S2 TG results of synthesized samples

| Samples | W(mg) | (35~200 °C)   | (200~530 °C)  | $\Delta W_{NiO}\%$ |
|---------|-------|---------------|---------------|--------------------|
|         |       | $\Delta W1\%$ | $\Delta W2\%$ |                    |
| 0035M   | 5.399 | 14.00         | 36.10         | 49.90              |
| 007M    | 4.608 | 6.40          | 27.93         | 65.67              |
| 011M    | 4.573 | 6.00          | 29.34         | 64.66              |
| 014M    | 4.426 | 5.24          | 28.67         | 66.07              |

Table S3 Elemental analysis results of the samples

| Samples | W     | N       | C       | H       | S       | Ni+O    |
|---------|-------|---------|---------|---------|---------|---------|
|         | (mg)  | (Wt. %) |
| 0035M   | 2.488 | 0.81    | 15.41   | 3.61    | 0.92    | 79.25   |
| 007M    | 2.167 | 3.13    | 12.28   | 3.19    | 2.38    | 79.02   |
| 011M    | 2.305 | 5.26    | 12.10   | 2.36    | 0.55    | 79.73   |
| 014M    | 2.507 | 3.49    | 11.01   | 2.24    | 1.99    | 81.27   |

Table S4 The gas response results of  $\alpha$ -Ni(OH)<sub>2</sub> nanocrystalline film sensor to NO<sub>x</sub>

| Volume Concentration (ppm) | 97   | 68   | 48.5 | 29.1 | 9.7  | 4.85 | 2.91 | 0.97 | 0.485 | 0.291 | 0.097 |
|----------------------------|------|------|------|------|------|------|------|------|-------|-------|-------|
| Sensitivity (%)            | 32.5 | 27.1 | 26.0 | 23.6 | 19.5 | 16.7 | 15.8 | 10.0 | 5.5   | 5.2   | 5.0   |
| Response time (s)          | 16   | 16   | 13   | 16   | 15   | 16   | 15   | 31   | 31    | 30    | 47    |

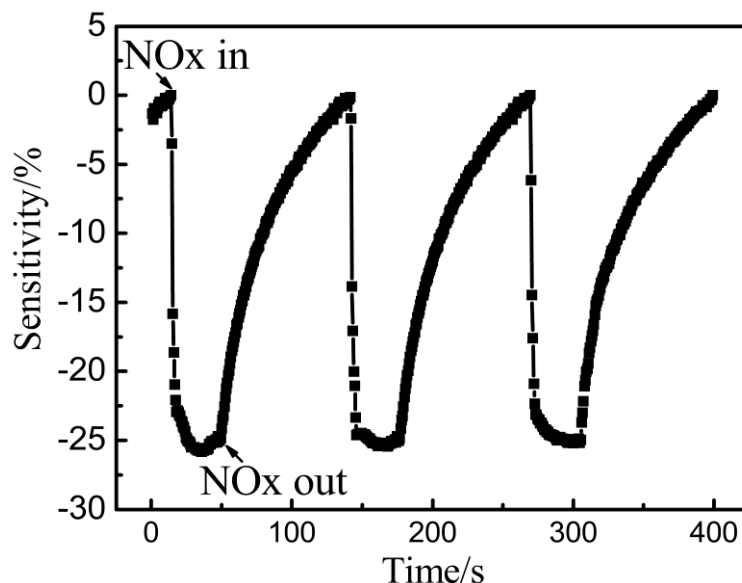

Fig. S2 Three circular of response-recovery curve of  $\alpha$ -Ni(OH)<sub>2</sub> (fresh) film to NO<sub>x</sub> concentration of 48.5 ppm. (sample: 007M; temperature: 20 °C; humidity: 40 %)

Table S5 Three circular test data of fresh  $\alpha$ -Ni(OH)<sub>2</sub> film(sample 007M) to NO<sub>x</sub> concentration of 48.5 ppm at 20 °C and humidity of 40 %

| Concentration of NO <sub>x</sub> (ppm) | 48.5 | 48.5 | 48.5 |
|----------------------------------------|------|------|------|
| Sensitivity (%)                        | 25.8 | 25.2 | 25.2 |
| Response time (s)                      | 3.0  | 4.0  | 3.3  |
| Recovery time (min)                    | 1.6  | 1.6  | 1.6  |

Three cyclic curve of layered  $\alpha$ -Ni(OH)<sub>2</sub> (fresh) film examined to 48.5 ppm NO<sub>x</sub> gas, the corresponding data and Figure were listed in Table S5 and Fig. S2. As is depicted, the total time of three circular was 387 s, and single cycle time was just 129 s. When the  $\alpha$ -Ni(OH)<sub>2</sub> film exposed to 48.5 ppm of NO<sub>x</sub>, the resistance rapidly decreased to a minimum, and then tend to be stable within

three of the same cycle. Table S5 exhibited the data which evaluate gas sensitivity of the  $\alpha$ -Ni(OH)<sub>2</sub> film within three of the same cycle in detail.

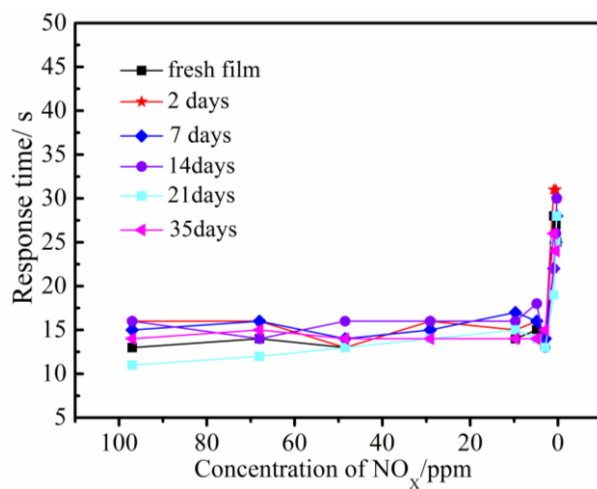

Fig. S3 Response time curves of  $\alpha$ -Ni(OH)<sub>2</sub>(007M sample) exposed to NO<sub>x</sub> with decreasing concentrations.
